# Supplementary material
Source: Research Square preprint supplement (doi:10.21203/rs.3.rs-9635147/v1)
Supplement: Supplementary file 1 [file 601ffadcf9c6f1b050297362.xlsx]

## Sheet: skeleton_daa
taxon	lfc_outcomedisease	q_outcomedisease	se_outcomedisease	diff_outcomedisease	diff_robust_outcomedisease	passed_ss_outcomedisease	lfc_direction	neg_log10_qval	sig	Domain	Phylum	Class	Order	Family	Genus	Species	completeness	contamination
P14_bin_1488_rn	-8.77786	0.000198119	0.789974	TRUE	TRUE	TRUE	Negative_LFC	3.70307	sig	Bacteria	Pseudomonadota	Gammaproteobacteria	Pseudomonadales	Cellvibrionaceae	Unclassified	Unclassified	100	0.14
P25_bin_5522_rn	-6.96842	1.62219e-05	0.465614	TRUE	TRUE	TRUE	Negative_LFC	4.7899	sig	Bacteria	Pseudomonadota	Gammaproteobacteria	Pseudomonadales	DSM-6294	Bermanella	Unclassified	93.73	8.35
P27_bin_78_rn	-6.79144	7.5192e-05	0.543945	TRUE	TRUE	TRUE	Negative_LFC	4.12383	sig	Bacteria	Pseudomonadota	Gammaproteobacteria	UBA6186	UBA6186	Unclassified	Unclassified	100	0.45
P26_bin_2634_rn	-6.51927	6.6618e-05	0.513942	TRUE	TRUE	TRUE	Negative_LFC	4.17641	sig	Bacteria	Pseudomonadota	Gammaproteobacteria	Enterobacterales	Alteromonadaceae	Pseudoalteromonas	Unclassified	99.84	4.81
P24_bin_224_rn	-6.45374	7.5192e-05	0.517293	TRUE	TRUE	TRUE	Negative_LFC	4.12383	sig	Bacteria	Pseudomonadota	Gammaproteobacteria	Enterobacterales	Alteromonadaceae	Thalassotalea_C	Unclassified	99.81	1.46
P26_bin_560_rn	-6.04346	5.77005e-05	0.468121	TRUE	TRUE	TRUE	Negative_LFC	4.23882	sig	Bacteria	Pseudomonadota	Gammaproteobacteria	Pseudomonadales	DSM-6294	Bacterioplanes	Unclassified	67.85	2.92
P25_bin_649_rn	-5.98748	0.000354206	0.577929	TRUE	TRUE	TRUE	Negative_LFC	3.45074	sig	Bacteria	Bacteroidota	Bacteroidia	Flavobacteriales	Flavobacteriaceae	Tenacibaculum	Unclassified	54.28	2.24
P14_bin_2706_rn	-5.90621	0.000514292	0.596697	TRUE	TRUE	TRUE	Negative_LFC	3.28879	sig	Bacteria	Pseudomonadota	Gammaproteobacteria	Enterobacterales	Alteromonadaceae	Alteromonas	Alteromonas macleodii	86.2	12.79
P24_bin_9583_rn	-5.5847	6.9556e-05	0.442864	TRUE	TRUE	TRUE	Negative_LFC	4.15767	sig	Bacteria	Pseudomonadota	Gammaproteobacteria	Enterobacterales	Alteromonadaceae	Alteromonas	Alteromonas aggregata	93.2	5.08
P24_bin_5577_rn	-5.31205	0.000693799	0.556923	TRUE	TRUE	TRUE	Negative_LFC	3.15877	sig	Bacteria	Pseudomonadota	Alphaproteobacteria	UBA8366	GCA-2696645	Curvivirga	Unclassified	74.2	1.62
P21_bin_5263_rn	-5.22047	0.00185657	0.61852	TRUE	TRUE	TRUE	Negative_LFC	2.73129	sig	Bacteria	Pseudomonadota	Gammaproteobacteria	Enterobacterales	Alteromonadaceae	Unclassified	Unclassified	99.86	0.35
P21_bin_7635_rn	-4.79327	8.85848e-05	0.392017	TRUE	TRUE	TRUE	Negative_LFC	4.05264	sig	Bacteria	Pseudomonadota	Gammaproteobacteria	Pseudomonadales	DSM-6294	Bacterioplanes	Unclassified	73.92	1.45
P14_bin_5326_rn	-4.45754	0.00234189	0.5441	TRUE	TRUE	TRUE	Negative_LFC	2.63043	sig	Bacteria	Pseudomonadota	Gammaproteobacteria	Enterobacterales	Alteromonadaceae	Pseudoalteromonas	Pseudoalteromonas ruthenica	95.06	3.56
P21_bin_25_rn	-4.03462	0.00460989	0.538409	TRUE	TRUE	TRUE	Negative_LFC	2.33631	sig	Bacteria	Pseudomonadota	Alphaproteobacteria	Micavibrionales	Micavibrionaceae	UBA6929	Unclassified	92.36	3.38
P24_bin_9652_rn	-4.0058	0.0114887	0.603392	TRUE	TRUE	TRUE	Negative_LFC	1.93973	sig	Bacteria	Pseudomonadota	Gammaproteobacteria	Pseudomonadales	Cellvibrionaceae	Pseudomaricurvus	Unclassified	99.67	2.27
P23_bin_9785_rn	-3.79727	0.00338587	0.486354	TRUE	TRUE	TRUE	Negative_LFC	2.47033	sig	Bacteria	Pseudomonadota	Gammaproteobacteria	Enterobacterales	Vibrionaceae	Vibrio	Vibrio coralliilyticus	94.13	7.75
P19_bin_3495_rn	-3.59596	0.00447321	0.477553	TRUE	TRUE	TRUE	Negative_LFC	2.34938	sig	Bacteria	Bacteroidota	Bacteroidia	Flavobacteriales	Flavobacteriaceae	JAOXRU01	Unclassified	73.56	11.79
P14_bin_1690_rn	-3.54204	0.00775435	0.506329	TRUE	TRUE	TRUE	Negative_LFC	2.11045	sig	Bacteria	Pseudomonadota	Gammaproteobacteria	Enterobacterales	Alteromonadaceae	Pseudoalteromonas	Unclassified	85.24	30.09
P23_bin_4853_rn	-3.53065	0.000737544	0.373257	TRUE	TRUE	TRUE	Negative_LFC	3.13221	sig	Bacteria	Pseudomonadota	Gammaproteobacteria	Enterobacterales	Alteromonadaceae	Pseudoalteromonas	Pseudoalteromonas rubra_B	71.79	4.96
P25_bin_2675_rn	-3.36389	0.0027463	0.419261	TRUE	TRUE	TRUE	Negative_LFC	2.56125	sig	Bacteria	Pseudomonadota	Gammaproteobacteria	Pseudomonadales	DSM-6294	Unclassified	Unclassified	57.47	18.21
P24_bin_4542_rn	-3.33039	0.00639255	0.463873	TRUE	TRUE	TRUE	Negative_LFC	2.19433	sig	Bacteria	Pseudomonadota	Gammaproteobacteria	Pseudomonadales	DSM-6294	Bermanella	Unclassified	54.64	5.62
P26_bin_276_rn	-3.21926	0.0474879	0.592904	TRUE	TRUE	TRUE	Negative_LFC	1.32342	sig	Bacteria	Pseudomonadota	Gammaproteobacteria	Pseudomonadales	DSM-6294	Bacterioplanoides	Bacterioplanoides sp024397975	98.15	8.16
P26_bin_1583_rn	-3.20548	0.0146525	0.499709	TRUE	TRUE	TRUE	Negative_LFC	1.83409	sig	Bacteria	Pseudomonadota	Gammaproteobacteria	Pseudomonadales	Unclassified	Unclassified	Unclassified	100	50.67
P26_bin_7695_rn	-2.50711	0.0123635	0.381727	TRUE	TRUE	TRUE	Negative_LFC	1.90786	sig	Bacteria	Planctomycetota	UBA1135	UBA1135	GCA-002686595	JANQEJ01	Unclassified	92.52	3.73
P32_bin_8584_rn	1.8296	0.0396012	0.328073	TRUE	TRUE	TRUE	Positive_LFC	1.40229	sig	Bacteria	Pseudomonadota	Alphaproteobacteria	Puniceispirillales	Puniceispirillaceae	HIMB100	Unclassified	61.81	10.17
P32_bin_3745_rn	2.21968	0.0288262	0.379546	TRUE	TRUE	TRUE	Positive_LFC	1.54021	sig	Bacteria	Pseudomonadota	Alphaproteobacteria	HIMB59	HIMB59	Unclassified	Unclassified	66.84	19.8
P33_bin_3387_rn	2.48418	0.029698	0.427013	TRUE	TRUE	TRUE	Positive_LFC	1.52727	sig	Bacteria	Cyanobacteriota	Vampirovibrionia	LMEP-6097	LMEP-6097	Unclassified	Unclassified	50.69	8.69
P32_bin_3256_rn	2.57003	0.0318113	0.4465	TRUE	TRUE	TRUE	Positive_LFC	1.49742	sig	Bacteria	Pseudomonadota	Alphaproteobacteria	Puniceispirillales	Puniceispirillaceae	JADHLI01	Unclassified	58.36	3.2
P32_bin_3288_rn	2.77354	0.0482385	0.513231	TRUE	FALSE	FALSE	Positive_LFC	1.31661	sig	Bacteria	Pseudomonadota	Alphaproteobacteria	Puniceispirillales	Puniceispirillaceae	WTJO01	WTJO01 sp011524805	75.23	6.15
P29_bin_3905_rn	3.0408	0.047773	0.561208	TRUE	TRUE	TRUE	Positive_LFC	1.32082	sig	Bacteria	Bacteroidota	Bacteroidia	Flavobacteriales	Flavobacteriaceae	RFYP01	RFYP01 sp011526365	100	3.31

## Sheet: ballast_daa
taxon	lfc_outcomedisease	q_outcomedisease	se_outcomedisease	diff_outcomedisease	diff_robust_outcomedisease	passed_ss_outcomedisease	lfc_direction	neg_log10_qval	sig	Domain	Phylum	Class	Order	Family	Genus	Species	completeness	contamination
P29_bin_11178_rn	-2.83751	0.00243325	0.117185	TRUE	TRUE	TRUE	Negative_LFC	2.61381	sig	Bacteria	Pseudomonadota	Alphaproteobacteria	Rickettsiales	Midichloriaceae	Unclassified	Unclassified	76.42	2.05
P29_bin_725_rn	-2.53285	0.00441291	0.121727	TRUE	TRUE	TRUE	Negative_LFC	2.35527	sig	Bacteria	Pseudomonadota	Gammaproteobacteria	Pseudomonadales	JAHEGP01	Unclassified	Unclassified	79.24	2.4
P16_bin_4606_rn	-1.64828	0.0204192	0.116911	TRUE	TRUE	TRUE	Negative_LFC	1.68996	sig	Bacteria	Pseudomonadota	Alphaproteobacteria	Rhodobacterales	Rhodobacteraceae	Nioella	Unclassified	63.59	12.52
P23_bin_5655_rn	-1.53355	0.0420058	0.131726	TRUE	TRUE	TRUE	Negative_LFC	1.37669	sig	Bacteria	Pseudomonadota	Alphaproteobacteria	Rhodobacterales	Rhodobacteraceae	Shimia	Shimia sp017743735	70.87	2.39
P35_bin_5010_rn	-1.15888	0.0432893	0.100505	TRUE	TRUE	TRUE	Negative_LFC	1.36362	sig	Bacteria	Pseudomonadota	Alphaproteobacteria	Rickettsiales	Midichloriaceae	Unclassified	Unclassified	77.55	0.91
P11_bin_131_rn	-1.14934	0.0222536	0.083478	TRUE	TRUE	TRUE	Negative_LFC	1.6526	sig	Bacteria	Pseudomonadota	Alphaproteobacteria	Rhodobacterales	Rhodobacteraceae	Ruegeria	Unclassified	64.43	15.26
P14_bin_1690_rn	-0.767365	0.0222536	0.0558096	TRUE	TRUE	TRUE	Negative_LFC	1.6526	sig	Bacteria	Pseudomonadota	Gammaproteobacteria	Enterobacterales	Alteromonadaceae	Pseudoalteromonas	Unclassified	85.24	30.09
P24_bin_9652_rn	1.66856	0.0376922	0.139139	TRUE	TRUE	TRUE	Positive_LFC	1.42375	sig	Bacteria	Pseudomonadota	Gammaproteobacteria	Pseudomonadales	Cellvibrionaceae	Pseudomaricurvus	Unclassified	99.67	2.27

## Sheet: ah_vs_du
taxon	lfc_healthdisease_unafected	q_healthdisease_unafected	se_healthdisease_unafected	diff_healthdisease_unafected	diff_robust_healthdisease_unafected	passed_ss_healthdisease_unafected	lfc_direction	neg_log10_qval	sig	Domain	Phylum	Class	Order	Family	Genus	Species	completeness	contamination
P4_bin_5309_rn	-1.31569	0.00830447	0.384747	TRUE	FALSE	FALSE	Negative_LFC	2.08069	sig	Bacteria	Cyanobacteriota	Cyanobacteriia	Phormidesmiales	Phormidesmiaceae	JAKSDM01	Unclassified	87.28	10.69
P28_bin_2976_rn	-1.2756	0.00576302	0.36024	TRUE	FALSE	FALSE	Negative_LFC	2.23935	sig	Bacteria	Cyanobacteriota	Cyanobacteriia	Cyanobacteriales	Spirulinaceae	CCY15215	Unclassified	100	0.67
P32_bin_3745_rn	-1.26504	0.00258538	0.332861	TRUE	FALSE	FALSE	Negative_LFC	2.58747	sig	Bacteria	Pseudomonadota	Alphaproteobacteria	HIMB59	HIMB59	Unclassified	Unclassified	66.84	19.8
P9_bin_2957_rn	-1.13217	0.0474697	0.38861	TRUE	FALSE	FALSE	Negative_LFC	1.32358	sig	Bacteria	Pseudomonadota	Gammaproteobacteria	Enterobacterales	GCA-2746155	Unclassified	Unclassified	84.69	1.21
P1_bin_3112_rn	-0.854325	0.0372195	0.291575	TRUE	FALSE	FALSE	Negative_LFC	1.42923	sig	Bacteria	Pseudomonadota	Alphaproteobacteria	UBA8366	Unclassified	Unclassified	Unclassified	69.62	5.48

## Sheet: ah_vs_dl
taxon	lfc_healthdisease_lesion	q_healthdisease_lesion	se_healthdisease_lesion	diff_healthdisease_lesion	diff_robust_healthdisease_lesion	passed_ss_healthdisease_lesion	lfc_direction	neg_log10_qval	sig	Domain	Phylum	Class	Order	Family	Genus	Species	completeness	contamination
P4_bin_5309_rn	-1.16364	0.0124211	0.360523	TRUE	TRUE	TRUE	Negative_LFC	1.90584	sig	Bacteria	Cyanobacteriota	Cyanobacteriia	Phormidesmiales	Phormidesmiaceae	JAKSDM01	Unclassified	87.28	10.69
P32_bin_3745_rn	-1.13324	0.0133272	0.353774	TRUE	TRUE	TRUE	Negative_LFC	1.87526	sig	Bacteria	Pseudomonadota	Alphaproteobacteria	HIMB59	HIMB59	Unclassified	Unclassified	66.84	19.8
P28_bin_2976_rn	-0.979219	0.0317588	0.338355	TRUE	TRUE	TRUE	Negative_LFC	1.49814	sig	Bacteria	Cyanobacteriota	Cyanobacteriia	Cyanobacteriales	Spirulinaceae	CCY15215	Unclassified	100	0.67
P16_bin_11_rn	0.830163	0.0441251	0.292834	TRUE	FALSE	FALSE	Positive_LFC	1.35531	sig	Bacteria	Bacteroidota	Ignavibacteria	Ignavibacteriales	Melioribacteraceae	IGN16	Unclassified	99.51	0.2
P32_bin_476_rn	0.839952	0.00624515	0.238998	TRUE	TRUE	TRUE	Positive_LFC	2.20446	sig	Bacteria	Bacteroidota	Bacteroidia	Flavobacteriales	Schleiferiaceae	UBA10364	UBA10364 sp002430755	62.9	3.71
P14_bin_5326_rn	0.900733	0.00795926	0.262311	TRUE	TRUE	TRUE	Positive_LFC	2.09913	sig	Bacteria	Pseudomonadota	Gammaproteobacteria	Enterobacterales	Alteromonadaceae	Pseudoalteromonas	Pseudoalteromonas ruthenica	95.06	3.56
P14_bin_4711_rn	0.958313	0.0469876	0.346799	TRUE	FALSE	FALSE	Positive_LFC	1.32802	sig	Bacteria	Pseudomonadota	Gammaproteobacteria	Enterobacterales	Alteromonadaceae	Algicola	Algicola sagamiensis	90.19	1.99
P29_bin_11178_rn	0.969575	0.017717	0.301565	TRUE	FALSE	FALSE	Positive_LFC	1.75161	sig	Bacteria	Pseudomonadota	Alphaproteobacteria	Rickettsiales	Midichloriaceae	Unclassified	Unclassified	76.42	2.05
P14_bin_1690_rn	0.973841	0.00931535	0.291755	TRUE	TRUE	TRUE	Positive_LFC	2.0308	sig	Bacteria	Pseudomonadota	Gammaproteobacteria	Enterobacterales	Alteromonadaceae	Pseudoalteromonas	Unclassified	85.24	30.09
P24_bin_4542_rn	1.01189	0.0333364	0.349762	TRUE	TRUE	TRUE	Positive_LFC	1.47708	sig	Bacteria	Pseudomonadota	Gammaproteobacteria	Pseudomonadales	DSM-6294	Bermanella	Unclassified	54.64	5.62
P1_bin_3311_rn	1.06885	0.0304595	0.352538	TRUE	TRUE	TRUE	Positive_LFC	1.51628	sig	Bacteria	Pseudomonadota	Alphaproteobacteria	Rhizobiales	Methyloligellaceae	Unclassified	Unclassified	54.39	9.58
P4_bin_3369_rn	1.10053	0.0159244	0.349239	TRUE	FALSE	FALSE	Positive_LFC	1.79794	sig	Bacteria	Pseudomonadota	Alphaproteobacteria	Rhodobacterales	Unclassified	Unclassified	Unclassified	50.06	10.39
P12_bin_1187_rn	1.12288	0.00481903	0.311941	TRUE	TRUE	TRUE	Positive_LFC	2.31704	sig	Bacteria	Pseudomonadota	Gammaproteobacteria	Pseudomonadales	Azotimanducaceae_A	UBA4421	Unclassified	97.37	4.57
P18_bin_8_rn	1.15068	0.0138965	0.354444	TRUE	FALSE	FALSE	Positive_LFC	1.8571	sig	Bacteria	Pseudomonadota	Gammaproteobacteria	Woeseiales	Woeseiaceae	UBA1847	Unclassified	100	0.16
P16_bin_4606_rn	1.2194	0.00619624	0.344895	TRUE	TRUE	TRUE	Positive_LFC	2.20787	sig	Bacteria	Pseudomonadota	Alphaproteobacteria	Rhodobacterales	Rhodobacteraceae	Nioella	Unclassified	63.59	12.52
P16_bin_4902_rn	1.36658	0.00378274	0.345101	TRUE	TRUE	TRUE	Positive_LFC	2.42219	sig	Bacteria	Pseudomonadota	Alphaproteobacteria	Sphingomonadales	Kordiimonadaceae	Kordiimonas	Unclassified	96.23	4.32
P24_bin_2237_rn	1.38375	0.00073218	0.33096	TRUE	TRUE	TRUE	Positive_LFC	3.13538	sig	Bacteria	Pseudomonadota	Gammaproteobacteria	Pseudomonadales	Oleiphilaceae	PZPK01	Unclassified	61.24	9.3
P15_bin_80_rn	1.47827	0.00124416	0.360788	TRUE	TRUE	TRUE	Positive_LFC	2.90512	sig	Bacteria	Pseudomonadota	Gammaproteobacteria	SZUA-229	SZUA-229	SZUA-229	Unclassified	96.36	1.37
P36_bin_4266_rn	1.50898	0.00068434	0.352184	TRUE	TRUE	TRUE	Positive_LFC	3.16473	sig	Bacteria	Pseudomonadota	Gammaproteobacteria	Beggiatoales	Beggiatoaceae	Unclassified	Unclassified	94.93	0.78
P19_bin_4933_rn	1.57255	9.38e-05	0.323239	TRUE	TRUE	TRUE	Positive_LFC	4.02798	sig	Bacteria	Pseudomonadota	Gammaproteobacteria	Woeseiales	Woeseiaceae	UBA1847	Unclassified	61	17.78
P24_bin_7007_rn	1.63607	0.00082923	0.363124	TRUE	FALSE	FALSE	Positive_LFC	3.08133	sig	Bacteria	Pseudomonadota	Alphaproteobacteria	Sphingomonadales	Kordiimonadaceae	Kordiimonas	Unclassified	53	1.82
P28_bin_1348_rn	1.65596	0.00018951	0.363851	TRUE	TRUE	TRUE	Positive_LFC	3.72237	sig	Bacteria	Pseudomonadota	Alphaproteobacteria	UBA8366	Unclassified	Unclassified	Unclassified	74.51	18.28
P4_bin_161_rn	1.65751	6.86e-05	0.336075	TRUE	TRUE	TRUE	Positive_LFC	4.16339	sig	Bacteria	Pseudomonadota	Alphaproteobacteria	Rhodobacterales	Rhodobacteraceae	Unclassified	Unclassified	51.21	12.37
P23_bin_5655_rn	1.6703	0.00051788	0.387172	TRUE	TRUE	TRUE	Positive_LFC	3.28577	sig	Bacteria	Pseudomonadota	Alphaproteobacteria	Rhodobacterales	Rhodobacteraceae	Shimia	Shimia sp017743735	70.87	2.39
P26_bin_1583_rn	1.69422	2.84e-05	0.329001	TRUE	TRUE	TRUE	Positive_LFC	4.54706	sig	Bacteria	Pseudomonadota	Gammaproteobacteria	Pseudomonadales	Unclassified	Unclassified	Unclassified	100	50.67
P11_bin_3344_rn	1.84065	0.00013446	0.364326	TRUE	TRUE	TRUE	Positive_LFC	3.87141	sig	Bacteria	Pseudomonadota	Gammaproteobacteria	Pseudomonadales	Porticoccaceae	Unclassified	Unclassified	68.43	16.35
P3_bin_2083_rn	1.86172	1.12e-05	0.346895	TRUE	TRUE	TRUE	Positive_LFC	4.94957	sig	Bacteria	Pseudomonadota	Alphaproteobacteria	Rhodobacterales	Rhodobacteraceae	Ruegeria	Unclassified	77.29	14.2
P25_bin_9209_rn	1.90888	4.79e-05	0.380958	TRUE	TRUE	TRUE	Positive_LFC	4.31961	sig	Bacteria	Pseudomonadota	Alphaproteobacteria	Rhodobacterales	Rhodobacteraceae	Pelagimonas	Unclassified	89.09	7.55
P19_bin_3393_rn	1.97892	4.11e-05	0.372195	TRUE	TRUE	TRUE	Positive_LFC	4.38615	sig	Bacteria	Pseudomonadota	Gammaproteobacteria	Pseudomonadales	Porticoccaceae	SCSIO-12696	Unclassified	71.36	3.47
P25_bin_649_rn	2.38722	8.24e-05	0.492134	TRUE	TRUE	TRUE	Positive_LFC	4.08425	sig	Bacteria	Bacteroidota	Bacteroidia	Flavobacteriales	Flavobacteriaceae	Tenacibaculum	Unclassified	54.28	2.24
P11_bin_1216_rn	2.65465	1.25e-06	0.434874	TRUE	TRUE	TRUE	Positive_LFC	5.90275	sig	Bacteria	Pseudomonadota	Alphaproteobacteria	Rhodobacterales	Rhodobacteraceae	Ruegeria	Unclassified	66.42	23.55
P14_bin_3729_rn	2.86685	2.47e-06	0.469506	TRUE	TRUE	TRUE	Positive_LFC	5.60779	sig	Bacteria	Pseudomonadota	Alphaproteobacteria	Rhodobacterales	Rhodobacteraceae	Roseovarius	Unclassified	57.54	12.43
P26_bin_276_rn	2.94212	2.35e-06	0.499943	TRUE	TRUE	TRUE	Positive_LFC	5.62826	sig	Bacteria	Pseudomonadota	Gammaproteobacteria	Pseudomonadales	DSM-6294	Bacterioplanoides	Bacterioplanoides sp024397975	98.15	8.16
P13_bin_2769_rn	2.99747	2.75e-07	0.45845	TRUE	TRUE	TRUE	Positive_LFC	6.5612	sig	Bacteria	Pseudomonadota	Alphaproteobacteria	Rhodobacterales	Rhodobacteraceae	JAOXSD01	JAOXSD01 sp025800205	81.67	2.75
P11_bin_131_rn	3.00531	6.98e-07	0.437059	TRUE	TRUE	TRUE	Positive_LFC	6.15637	sig	Bacteria	Pseudomonadota	Alphaproteobacteria	Rhodobacterales	Rhodobacteraceae	Ruegeria	Unclassified	64.43	15.26
P2_bin_2057_rn	3.64899	3.61e-09	0.442387	TRUE	TRUE	TRUE	Positive_LFC	8.44274	sig	Bacteria	Pseudomonadota	Alphaproteobacteria	Rhodobacterales	Rhodobacteraceae	Aliiroseovarius	Unclassified	93	1.17

## Sheet: du_vs_dl
taxon	lfc_healthdisease_lesion_healthdisease_unafected	q_healthdisease_lesion_healthdisease_unafected	se_healthdisease_lesion_healthdisease_unafected	diff_healthdisease_lesion_healthdisease_unafected	diff_robust_healthdisease_lesion_healthdisease_unafected	passed_ss_healthdisease_lesion_healthdisease_unafected	lfc_direction	neg_log10_qval	sig	Domain	Phylum	Class	Order	Family	Genus	Species	completeness	contamination
P14_bin_5326_rn	0.986008	0.0214548	0.324787	TRUE	FALSE	FALSE	Positive_LFC	1.66848	sig	Bacteria	Pseudomonadota	Gammaproteobacteria	Enterobacterales	Alteromonadaceae	Pseudoalteromonas	Pseudoalteromonas ruthenica	95.06	3.56
P24_bin_15272_rn	0.999081	0.0449796	0.353607	TRUE	FALSE	FALSE	Positive_LFC	1.34698	sig	Bacteria	Bdellovibrionota	Bacteriovoracia	Bacteriovoracales	Bacteriovoracaceae	Unclassified	Unclassified	59.65	3.31
P1_bin_1544_rn	1.0087	0.0383556	0.348771	TRUE	FALSE	FALSE	Positive_LFC	1.41617	sig	Bacteria	Pseudomonadota	Alphaproteobacteria	Kiloniellales	JAKSBE01	JAKSBE01	JAKSBE01 sp022361275	76.23	5.86
P12_bin_1187_rn	1.01359	0.0414353	0.362561	TRUE	FALSE	FALSE	Positive_LFC	1.38263	sig	Bacteria	Pseudomonadota	Gammaproteobacteria	Pseudomonadales	Azotimanducaceae_A	UBA4421	Unclassified	97.37	4.57
P24_bin_224_rn	1.06413	0.0194673	0.306415	TRUE	FALSE	FALSE	Positive_LFC	1.71069	sig	Bacteria	Pseudomonadota	Gammaproteobacteria	Enterobacterales	Alteromonadaceae	Thalassotalea_C	Unclassified	99.81	1.46
P2_bin_5537_rn	1.0892	0.0227096	0.3485	TRUE	FALSE	FALSE	Positive_LFC	1.64379	sig	Bacteria	Pseudomonadota	Alphaproteobacteria	Minwuiales	Minwuiaceae	JANQEE01	Unclassified	65.98	15.83
P8_bin_1160_rn	1.13725	0.025615	0.375279	TRUE	FALSE	FALSE	Positive_LFC	1.5915	sig	Bacteria	Pseudomonadota	Unclassified	Unclassified	Unclassified	Unclassified	Unclassified	70.67	12.13
P1_bin_3112_rn	1.15436	0.0109209	0.3323	TRUE	FALSE	FALSE	Positive_LFC	1.96174	sig	Bacteria	Pseudomonadota	Alphaproteobacteria	UBA8366	Unclassified	Unclassified	Unclassified	69.62	5.48
P14_bin_4711_rn	1.20496	0.0174032	0.37789	TRUE	FALSE	FALSE	Positive_LFC	1.75937	sig	Bacteria	Pseudomonadota	Gammaproteobacteria	Enterobacterales	Alteromonadaceae	Algicola	Algicola sagamiensis	90.19	1.99
P29_bin_11178_rn	1.207	0.00623044	0.328674	TRUE	FALSE	FALSE	Positive_LFC	2.20548	sig	Bacteria	Pseudomonadota	Alphaproteobacteria	Rickettsiales	Midichloriaceae	Unclassified	Unclassified	76.42	2.05
P23_bin_4655_rn	1.24481	0.0114253	0.309875	TRUE	FALSE	FALSE	Positive_LFC	1.94213	sig	Bacteria	Pseudomonadota	Gammaproteobacteria	Pseudomonadales	Oleiphilaceae	Marinobacter	Marinobacter salsuginis	54.54	7.23
P3_bin_2520_rn	1.27049	0.00573728	0.355098	TRUE	FALSE	FALSE	Positive_LFC	2.24129	sig	Bacteria	Pseudomonadota	Alphaproteobacteria	Kiloniellales	DSM-21159	JANQMX01	Unclassified	67.57	11.29
P1_bin_1444_rn	1.2772	0.00659848	0.360547	TRUE	TRUE	TRUE	Positive_LFC	2.18056	sig	Bacteria	Pseudomonadota	Alphaproteobacteria	Kiloniellales	JAKSDN01	Unclassified	Unclassified	59.46	8.62
P16_bin_4606_rn	1.29569	0.00841051	0.383659	TRUE	TRUE	TRUE	Positive_LFC	2.07518	sig	Bacteria	Pseudomonadota	Alphaproteobacteria	Rhodobacterales	Rhodobacteraceae	Nioella	Unclassified	63.59	12.52
P2_bin_4614_rn	1.30156	0.00400395	0.347633	TRUE	FALSE	FALSE	Positive_LFC	2.39751	sig	Bacteria	Pseudomonadota	Alphaproteobacteria	Caulobacterales	Parvularculaceae	Hyphococcus	Unclassified	86.99	3.45
P26_bin_560_rn	1.33219	0.00762153	0.371581	TRUE	FALSE	FALSE	Positive_LFC	2.11796	sig	Bacteria	Pseudomonadota	Gammaproteobacteria	Pseudomonadales	DSM-6294	Bacterioplanes	Unclassified	67.85	2.92
P32_bin_5257_rn	1.33482	0.0111891	0.395303	TRUE	FALSE	FALSE	Positive_LFC	1.95121	sig	Bacteria	Pseudomonadota	Gammaproteobacteria	Pseudomonadales	Azotimanducaceae_A	RGAU01	RGAU01 sp009919975	74.7	1.79
P24_bin_7007_rn	1.34329	0.00781406	0.374929	TRUE	FALSE	FALSE	Positive_LFC	2.10712	sig	Bacteria	Pseudomonadota	Alphaproteobacteria	Sphingomonadales	Kordiimonadaceae	Kordiimonas	Unclassified	53	1.82
P2_bin_6157_rn	1.41683	0.00777833	0.410162	TRUE	FALSE	FALSE	Positive_LFC	2.10911	sig	Bacteria	Pseudomonadota	Alphaproteobacteria	Kiloniellales	DSM-21159	JANQMX01	Unclassified	96.47	1.95
P25_bin_5522_rn	1.43607	0.00214541	0.323908	TRUE	FALSE	FALSE	Positive_LFC	2.66849	sig	Bacteria	Pseudomonadota	Gammaproteobacteria	Pseudomonadales	DSM-6294	Bermanella	Unclassified	93.73	8.35
P23_bin_5655_rn	1.49949	0.00533376	0.425761	TRUE	FALSE	FALSE	Positive_LFC	2.27297	sig	Bacteria	Pseudomonadota	Alphaproteobacteria	Rhodobacterales	Rhodobacteraceae	Shimia	Shimia sp017743735	70.87	2.39
P4_bin_3369_rn	1.50245	0.00256099	0.39328	TRUE	FALSE	FALSE	Positive_LFC	2.59159	sig	Bacteria	Pseudomonadota	Alphaproteobacteria	Rhodobacterales	Unclassified	Unclassified	Unclassified	50.06	10.39
P26_bin_1583_rn	1.50342	0.00129043	0.378829	TRUE	TRUE	TRUE	Positive_LFC	2.88926	sig	Bacteria	Pseudomonadota	Gammaproteobacteria	Pseudomonadales	Unclassified	Unclassified	Unclassified	100	50.67
P19_bin_3393_rn	1.5143	0.00434489	0.410706	TRUE	TRUE	TRUE	Positive_LFC	2.36202	sig	Bacteria	Pseudomonadota	Gammaproteobacteria	Pseudomonadales	Porticoccaceae	SCSIO-12696	Unclassified	71.36	3.47
P14_bin_1690_rn	1.54795	0.000457233	0.355	TRUE	TRUE	TRUE	Positive_LFC	3.33986	sig	Bacteria	Pseudomonadota	Gammaproteobacteria	Enterobacterales	Alteromonadaceae	Pseudoalteromonas	Unclassified	85.24	30.09
P24_bin_2237_rn	1.64201	0.000324518	0.366203	TRUE	TRUE	TRUE	Positive_LFC	3.48876	sig	Bacteria	Pseudomonadota	Gammaproteobacteria	Pseudomonadales	Oleiphilaceae	PZPK01	Unclassified	61.24	9.3
P24_bin_4542_rn	1.65075	0.000680689	0.387187	TRUE	TRUE	TRUE	Positive_LFC	3.16705	sig	Bacteria	Pseudomonadota	Gammaproteobacteria	Pseudomonadales	DSM-6294	Bermanella	Unclassified	54.64	5.62
P18_bin_8_rn	1.65397	0.000417933	0.367572	TRUE	TRUE	TRUE	Positive_LFC	3.37889	sig	Bacteria	Pseudomonadota	Gammaproteobacteria	Woeseiales	Woeseiaceae	UBA1847	Unclassified	100	0.16
P36_bin_4266_rn	1.66075	0.000648195	0.381265	TRUE	TRUE	TRUE	Positive_LFC	3.18829	sig	Bacteria	Pseudomonadota	Gammaproteobacteria	Beggiatoales	Beggiatoaceae	Unclassified	Unclassified	94.93	0.78
P15_bin_80_rn	1.78822	0.000216662	0.378066	TRUE	TRUE	TRUE	Positive_LFC	3.66422	sig	Bacteria	Pseudomonadota	Gammaproteobacteria	SZUA-229	SZUA-229	SZUA-229	Unclassified	96.36	1.37
P11_bin_3344_rn	1.90893	0.000208738	0.394488	TRUE	TRUE	TRUE	Positive_LFC	3.6804	sig	Bacteria	Pseudomonadota	Gammaproteobacteria	Pseudomonadales	Porticoccaceae	Unclassified	Unclassified	68.43	16.35
P23_bin_4853_rn	1.98101	0.000100789	0.366713	TRUE	TRUE	TRUE	Positive_LFC	3.99659	sig	Bacteria	Pseudomonadota	Gammaproteobacteria	Enterobacterales	Alteromonadaceae	Pseudoalteromonas	Pseudoalteromonas rubra_B	71.79	4.96
P19_bin_4933_rn	1.98482	1.70936e-05	0.365098	TRUE	TRUE	TRUE	Positive_LFC	4.76717	sig	Bacteria	Pseudomonadota	Gammaproteobacteria	Woeseiales	Woeseiaceae	UBA1847	Unclassified	61	17.78
P16_bin_4902_rn	2.06595	2.1655e-05	0.334504	TRUE	TRUE	TRUE	Positive_LFC	4.66444	sig	Bacteria	Pseudomonadota	Alphaproteobacteria	Sphingomonadales	Kordiimonadaceae	Kordiimonas	Unclassified	96.23	4.32
P28_bin_1348_rn	2.09133	3.68207e-05	0.412078	TRUE	TRUE	TRUE	Positive_LFC	4.43391	sig	Bacteria	Pseudomonadota	Alphaproteobacteria	UBA8366	Unclassified	Unclassified	Unclassified	74.51	18.28
P25_bin_9209_rn	2.10625	4.79062e-05	0.421438	TRUE	TRUE	TRUE	Positive_LFC	4.31961	sig	Bacteria	Pseudomonadota	Alphaproteobacteria	Rhodobacterales	Rhodobacteraceae	Pelagimonas	Unclassified	89.09	7.55
P3_bin_2083_rn	2.13612	8.79544e-06	0.389703	TRUE	TRUE	TRUE	Positive_LFC	5.05574	sig	Bacteria	Pseudomonadota	Alphaproteobacteria	Rhodobacterales	Rhodobacteraceae	Ruegeria	Unclassified	77.29	14.2
P4_bin_161_rn	2.18089	5.31421e-06	0.379511	TRUE	TRUE	TRUE	Positive_LFC	5.27456	sig	Bacteria	Pseudomonadota	Alphaproteobacteria	Rhodobacterales	Rhodobacteraceae	Unclassified	Unclassified	51.21	12.37
P26_bin_276_rn	2.47249	5.51885e-05	0.501125	TRUE	TRUE	TRUE	Positive_LFC	4.25815	sig	Bacteria	Pseudomonadota	Gammaproteobacteria	Pseudomonadales	DSM-6294	Bacterioplanoides	Bacterioplanoides sp024397975	98.15	8.16
P25_bin_649_rn	2.62064	3.00628e-05	0.504065	TRUE	TRUE	TRUE	Positive_LFC	4.52197	sig	Bacteria	Bacteroidota	Bacteroidia	Flavobacteriales	Flavobacteriaceae	Tenacibaculum	Unclassified	54.28	2.24
P13_bin_2769_rn	2.63834	1.09072e-05	0.485586	TRUE	TRUE	TRUE	Positive_LFC	4.96229	sig	Bacteria	Pseudomonadota	Alphaproteobacteria	Rhodobacterales	Rhodobacteraceae	JAOXSD01	JAOXSD01 sp025800205	81.67	2.75
P11_bin_131_rn	2.67669	8.89392e-06	0.452531	TRUE	TRUE	TRUE	Positive_LFC	5.05091	sig	Bacteria	Pseudomonadota	Alphaproteobacteria	Rhodobacterales	Rhodobacteraceae	Ruegeria	Unclassified	64.43	15.26
P14_bin_3729_rn	2.81485	3.79834e-06	0.475437	TRUE	TRUE	TRUE	Positive_LFC	5.42041	sig	Bacteria	Pseudomonadota	Alphaproteobacteria	Rhodobacterales	Rhodobacteraceae	Roseovarius	Unclassified	57.54	12.43
P11_bin_1216_rn	2.88155	1.66205e-06	0.482151	TRUE	TRUE	TRUE	Positive_LFC	5.77936	sig	Bacteria	Pseudomonadota	Alphaproteobacteria	Rhodobacterales	Rhodobacteraceae	Ruegeria	Unclassified	66.42	23.55
P2_bin_2057_rn	3.49395	4.48928e-08	0.474297	TRUE	TRUE	TRUE	Positive_LFC	7.34782	sig	Bacteria	Pseudomonadota	Alphaproteobacteria	Rhodobacterales	Rhodobacteraceae	Aliiroseovarius	Unclassified	93	1.17
